# Supplementary material for: Phenotypic and functional characterization of the CD6-ALCAM T-cell co-stimulatory pathway after allogeneic cell transplantation
Source: PubMed Central journal article supplement — Haematologica. 2022 Apr 28;107(11):2617–29. doi: 10.3324/haematol.2021.280444 (PMC9614543; doi:10.3324/haematol.2021.280444), 2022-04-28
Supplement: 2021_280444_RAMBALDI_SUPPL.pdf [file 2021_280444_RAMBALDI_SUPPL.pdf]

# Phenotypic and functional characterization of the CD6-ALCAM T-cell co-stimulatory pathway after allogeneic cell transplantation

Benedetta Rambaldi,<sup>1,2</sup> Haesook T. Kim,<sup>3</sup> Yohei Arihara,<sup>1,4</sup> Takeru Asano,<sup>1,5</sup> Carol Reynolds,<sup>1</sup> Mariah Manter,<sup>1</sup> Max Halpern,<sup>1</sup> Augustine Weber,<sup>1</sup> John Koreth,<sup>1</sup> Corey Cutler,<sup>1</sup> Mahasweta Gooptu,<sup>1</sup> Sarah Nikiforow,<sup>1</sup> Vincent T. Ho,<sup>1</sup> Joseph H. Antin,<sup>1</sup> Rizwan Romee,<sup>1</sup> Jeanette Ampudia,<sup>6</sup> Cherie Ng,<sup>6</sup> Stephen Connelly,<sup>6</sup> Robert J. Soiffer<sup>1</sup> and Jerome Ritz<sup>1</sup>

<sup>1</sup>Department of Medical Oncology, Dana-Farber Cancer Institute and Harvard Medical School, Boston, MA, USA; <sup>2</sup>Ph.D. Program in Translational and Molecular Medicine (DIMET), University of Milano-Bicocca, Monza, Italy; <sup>3</sup>Department of Data Science, Dana-Farber Cancer Institute, Harvard T H Chan School of Public Health, Boston, MA, USA; <sup>4</sup>Department of Medical Oncology, Sapporo Medical University, Sapporo, Japan; <sup>5</sup>Department of Hematology and Oncology, Himeji Red Cross Hospital, Hyogo, Japan and <sup>6</sup>Equillum, La Jolla, CA, USA

**Correspondence:** J. Ritz  
[jerome\\_ritz@dfci.harvard.edu](mailto:jerome_ritz@dfci.harvard.edu)

**Received:** December 8, 2021.

**Accepted:** April 15, 2022.

**Prepublished:** April 28, 2022.

<https://doi.org/10.3324/haematol.2021.280444>

©2022 Ferrata Storti Foundation

Published under a CC-BY-NC license

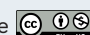

## **Supplemental Materials for**

### **Phenotypic and functional characterization of the CD6-ALCAM T cell costimulatory pathway after allogeneic cell transplantation**

Benedetta Rambaldi<sup>1,2</sup>, Haesook T. Kim<sup>3</sup>, Yohei Arihara<sup>1,4</sup>, Takeru Asano<sup>1,5</sup>, Carol Reynolds<sup>1</sup>, Mariah Manter<sup>1</sup>, Max Halpern<sup>1</sup>, Augustine Weber<sup>1</sup>, John Koreth<sup>1</sup>, Corey Cutler<sup>1</sup>, Mahasweta Gooptu<sup>1</sup>, Sarah Nikiforow<sup>1</sup>, Vincent T. Ho<sup>1</sup>, Joseph H. Antin<sup>1</sup>, Rizwan Romee<sup>1</sup>, Jeanette Ampudia<sup>6</sup>, Cherie Ng<sup>6</sup>, Stephen Connelly<sup>6</sup>, Robert J. Soiffer<sup>1</sup> and Jerome Ritz<sup>1\*</sup>

#### **Affiliations:**

<sup>1</sup>Department of Medical Oncology, Dana-Farber Cancer Institute and Harvard Medical School, Boston, MA

<sup>2</sup>Ph.D. Program in Translational and Molecular Medicine (DIMET), University of Milano-Bicocca, Monza, Italy

<sup>3</sup>Department of Data Science, Dana-Farber Cancer Institute, Harvard T H Chan School of Public Health, Boston, MA

<sup>4</sup>Department of Medical Oncology, Sapporo Medical University

<sup>5</sup>Department of Hematology and Oncology, Himeji Red Cross Hospital, Hyogo, Japan

<sup>6</sup>Equillium, La Jolla, CA, USA

#### **Corresponding author:**

\*Jerome Ritz, MD

450 Brookline Ave,

Boston, MA 02215

Tel. 617-632-3465

Email: [jerome\\_ritz@dfci.harvard.edu](mailto:jerome_ritz@dfci.harvard.edu)

## SUPPLEMENTAL METHODS

### Cell processing for *in vitro* functional assays

For functional *in vitro* assay, PBMC were isolated from freshly drawn blood samples by density gradient centrifugation (Ficoll-Paque PLUS; GE Healthcare) and cryopreserved in RPMI 10% DMSO before being utilized. For *in vitro* culture of PBMC or T cells complete medium (CM) was used. CM was made using DMEM (Cat 11995-065 Gibco), 10% FBS (Heat Inactivated, Gibco 10437-028), 1% Penicillin-Streptomycin (Gibco, 100X, 15140122), HEPES 10mM (Gibco, 1M, 15630080), 1% MEM Non-ess A.A. (Gibco, 100X, 11140050) and 2-Mercaptoethanol 0.05mM (Sigma-Aldrich, 14.3M, M3148).

### Functional activity of itolizumab *in vitro*

Frozen PBMC obtained from patients who developed aGVHD after transplant (Supplemental Table S1) were stimulated using a combination of antiCD3/CD2/CD28 beads (Treg Suppression Inspector human 2.5 ml  $5 \times 10^7$  Anti-Biotin MACSiBead particles preloaded with biotinylated CD2/CD3/CD28 antibodies, Miltenyi 130-092-909) at a bead:cell ratio of 1:2 in the presence of itolizumab 10  $\mu\text{g/ml}$  (Biocon Ltd, Bangalore, India) or isotype control 10  $\mu\text{g/ml}$  (cetuximab Erbitux NDC 66733-948-23, LOT c1800010). To detect T cell proliferation, PBMC were stained with CFSE (Invitrogen Thermo Fisher Scientific) as per product instruction. T cell proliferation, activation and maturation were evaluated after 72 hours of culture using the flow cytometry panel in Supplemental Table S3 and analyzed using FlowJo software. An example of the gating strategy used in this analysis is shown in Supplemental Figure S3.

### Complement dependent cytotoxicity (CDC), antibody direct cytotoxicity (ADC)

After thawing HD PBMC, CD3<sup>+</sup> T cells were isolated using EasySep Human T-Cell isolation Kit (STEMCELL Cat 17951 Lot 17F79887) as per manufacturer's instructions. Purity of isolated CD3<sup>+</sup> T cells was assessed using flow cytometry with FITC-conjugated anti-CD3 antibody (Ab) (BioLegend, clone UCHT1, cat 300406). After T cell isolation, we obtained a median percentage of 96.9%, CD3<sup>+</sup> cells (range 90.5-98.1%). After 15 minutes pre-incubation with itolizumab (Biocon Ltd, Bangalore, India), positive control alemtuzumab (10  $\mu\text{g/ml}$ , Campath-1H, anti-CD52, human IgG1, BioVision A1105-200, Lot 4M13A11050) or negative control cetuximab (10  $\mu\text{g/ml}$ , Erbitux NDC 66733-948-23, LOT c1800010), isolated CD3<sup>+</sup> T cells were cultured at a concentration of  $1 \times 10^6/\text{ml}$  in the presence of CM with (for CDC) or without (for ADC) 25% human serum. Cells were incubated at 37°C, 5% CO<sub>2</sub> for 6 or 24 hours. At the end of cell culture, the cell plate was kept on ice to prevent

further complement activity. Harvested cells were stained with 7-AAD (BD, 51-68981E' sold as 559925) and PE-conjugated Annexin V (BD, 51-65875X, sold as 556422) as per manufacturer's instructions and acquired on Fortessa LSR flow cytometer (BD). Each sample was acquired at medium velocity for 180 seconds. Analysis was performed using FlowJo software. An example of gating strategy is shown in Supplemental Figure 6. Percentage lysis was calculated by the average of % of 7-AAD and/or Annexin V positive cells. To detect complement-mediated cell death (CDC), percent specific lysis was calculated by subtracting the value obtained in conditions with Ab alone from the value obtained in the presence of AB+ human serum (HS). ADC activity was calculated by subtracting the values obtained in culture with medium alone from the values obtained in cultures with medium + antibody. CDC and ADC were assessed after 6 and 24 hours of culture.

### **Antibody dependent cellular cytotoxicity (ADCC) assay**

Thawed HD PBMC were cultured at a final concentration of  $1 \times 10^6$ /ml in the presence of CM and specific ab at a concentration of 10  $\mu$ g/ml. Cells were incubated at 37°C, 5% CO<sub>2</sub> for 6 hours. Harvested cells were stained with FITC-conjugated anti-CD3 Ab (BioLegend, clone UCHT1, cat 300406), BV510-conjugated anti-CD56 Ab (BioLegend, clone HCD56 NCAM, cat 318340) and APC-conjugated anti-CD107a LAMP-1 (BioLegend, clone H4A3, cat 328620) and incubated for 30 minutes. Cells were washed two times and then stained with 7-AAD (BD, 51-68981E' sold as 559925) and PE-conjugated Annexin V (BD, 51-65875X, sold as 556422) as per manufacturer's instructions and acquired on Fortessa LSR flow cytometer (BD). Each sample was acquired at medium velocity for 180 seconds. Analysis was performed using FlowJo software. To set the positive threshold for CD107a expression an APC-conjugated isotype mouse IgG1 (BioLegend, clone MOPC-21, cat 400122) was used. An example of gating strategy is shown in Supplemental Figure 6.

### **T cell stimulation assay using ALCAM-Fc and anti-CD3 Ab**

Recombinant Human ALCAM Fc Chimera (ALCAM-Fc, R&D Systems, cat 7187-AL-100) 10  $\mu$ g/ml and anti-CD3 Ab 5  $\mu$ g/ml (Invitrogen Thermo Fisher Scientific, clone OKT3, cat 16-0037-85) were resuspend in PBS (Gibco 10010-023, pH7.4) overnight at 4°C in flat bottom 96 well plate. Plate was washed 2 times with PBS before adding cells. After thawing HD PBMC, CD3<sup>+</sup> T cells were isolated through negative selection using the EasySep Human T-Cell isolation Kit (STEMCELL Cat 17951 Lot 17F79887) as per manufacturer's instructions. Purity of isolated CD3 T cells was assessed using flowcytometry with FITC-conjugated anti-CD3 antibody (Ab) (BioLegend, clone UCHT1, cat 300406), median CD3<sup>+</sup> cells of 98.15%, range 94.7-99.2%. Isolated T cells were cultured in complete medium (CM) with itolizumab (10  $\mu$ g/ml) or cetuximab (10  $\mu$ g/ml) at 37°C, 5% CO<sub>2</sub> for 96 hours.

Cells were analyzed using flow cytometry (supplemental Table 4) and analyzed using FlowJo software. An example of gating strategy used is shown in Supplemental Figure 3.

### **Statistical analysis**

Data analysis was primarily descriptive using the Wilcoxon rank-sum test for unpaired group comparison and the Wilcoxon signed-rank test for paired comparison. All tests were 2-sided at the significance level of 0.05 and multiple comparisons were not considered. Statistical analysis was performed using SAS version 9.2 (SAS Institute, Inc., Cary, NC) and R version 3.3.2 (the CRAN project) and Prism software (GraphPad). All graphs were made using Prism software (GraphPad). Heatmap was generated using GENE-E (<http://www.broadinstitute.org/cancer/software/GENE-E>).

| EXP | SEX | AGE | DX  | DONOR | GVHD<br>PROPHY | GVHD<br>GRADE | SKIN | LIVER | GUT | AGVHD TX             |
|-----|-----|-----|-----|-------|----------------|---------------|------|-------|-----|----------------------|
| 1   | F   | 37  | NHL | MUD   | Siro/Tac/MTX   | 3             | 3    | 0     | 0   | Pred/ECP             |
| 2   | M   | 65  | NHL | MUD   | Siro/Tac/MTX   | 2             | 3    | 0     | 1   | Pred                 |
| 3   | M   | 42  | NHL | MRD   | Siro/Tac/MTX   | 2             | 3    | 0     | 0   | Pred                 |
| 4   | F   | 52  | MM  | MUD   | Siro/Tac/MTX   | 2             | 0    | 1     | 1   | Pred                 |
| 5   | F   | 49  | NHL | MUD   | Tac/MTX        | 1             | 2    | 0     | 0   | Pred                 |
| 6   | M   | 71  | MF  | MUD   | Tac/MTX        | 2             | 0    | 0     | 1   | Pred                 |
| 7   | F   | 52  | NHL | MUD   | Tac/MTX        | 2             | 3    | 0     | 0   | Pred                 |
| 8   | M   | 71  | MDS | MUD   | Tac/MTX        | 4             | 0    | 2     | 4   | Pred<br>/Ruxolitinib |
| 9   | M   | 61  | AML | MUD   | Tac/MTX        | 2             | 3    | 0     | 0   | Pred                 |

**Table S1. Clinical characteristics of patients with aGVHD used for *in vitro* functional assays.**

EXP, experiment number; DX, diagnosis; GVHD PROPHY, Graft versus host disease prophylaxis; aGVHD TX, acute GVHD treatment; NHL, non-Hodgkin lymphoma; MM, multiple myeloma, MF, Myelofibrosis; MDS, myelodysplastic syndrome; AML, acute myeloid leukemia; MUD, matched unrelated donor; MRD, matched related donor; Siro, sirolimus; Tac, tacrolimus; MTX, methotrexate; Pred, prednisone > 1 mg/Kg; ECP, extracorporeal photopheresis. All patients received a reduced intensity conditioning based on busulfan and fludarabine combination and a peripheral blood stem cell graft.

| TUBE        | TARGET     | FLUOROCHROME        | CLONE    | COMPANY         | PRODUCT     |
|-------------|------------|---------------------|----------|-----------------|-------------|
| T CELL TUBE | CD45RA     | BV605               | HL100    | BioLegend       | 304133      |
|             | CD279 PD-1 | PE                  | J105     | Invitrogen      | 12-2799-42  |
|             | CD127      | APC                 | eBioRDR5 | Invitrogen      | 17-1278-42  |
|             | CD25       | FITC                | m-A251   | BioLegend       | 356105      |
|             | CCR7       | BV711               | G043-H7  | BioLegend       | 353227      |
|             | CD4        | BV510               | RPA-T4   | BioLegend       | 300545      |
|             | CD3        | BV786               | UCHT1    | BioLegend       | 300472      |
|             | CD8        | Alexa 700           | RPA-T8   | BioLegend       | 301027      |
|             | CD95       | PeCF594 (PE Dazzle) | DX2      | BioLegend       | 305633      |
|             | CD6        | BV650               | M-T605   | BD              | 743448      |
|             | APC TUBE   | CD45                | APC-Cy7  | 2D1             | BD          |
| LINEAGE:    |            | PE-Cy7              |          |                 |             |
| CD3         |            |                     | SK7      | BD              | 557851      |
| CD19        |            |                     | SJ25C1   | BD              | 341093      |
| CD56        |            |                     | B159     | BD              | 557747      |
| CD14        |            |                     | M5E2     | BD              | 557742      |
| HLA-DR      |            | BV510               | G46-6    | BD              | 563083      |
| CD11c       |            | PE-Cy5              | B-LY6    | BD              | 551077      |
| CD123       |            | FITC                | AC145    | Miltenyi Biotec | 130-090-897 |
| CD166       |            | BV421               | 3A6      | BD              | 562936      |
| ALCAM       |            |                     |          |                 |             |
| PD-L1       |            | BV786               | MIH1     | BD              | 563739      |
| CD14        |            | BV605               | M5E2     | BioLegend       | 301833      |

**Table S2. Conjugated monoclonal antibodies in the flow cytometry immune monitoring panel.** One tube was used for the characterization of CD6 expression on T cells (T CELL TUBE) and another tube for the characterization of ALCAM expression on monocytes and antigen presenting cells (APC TUBE).

| <b>TARGET</b>     | <b>FLUOROCHROME</b> | <b>CLONE</b> | <b>COMPANY</b>                         | <b>PRODUCT</b> |
|-------------------|---------------------|--------------|----------------------------------------|----------------|
| <b>CD3</b>        | AF700               | UCHT1        | BD                                     | 557943         |
| <b>CD4</b>        | BV510               | SK3          | BD                                     | 562970         |
| <b>CD8</b>        | PerCP/Cy5.5         | RPA-T8       | BioLegend                              | 301032         |
| <b>CD25</b>       | PE-CF594            | M-A251       | BD                                     | 562403         |
| <b>CD45RO</b>     | BV786               | UCHL1        | BD                                     | 564290         |
| <b>CD14</b>       | PE-Cy7              | M5E2         | BioLegend                              | 301814         |
| <b>CD166</b>      | BV421               | 3A6          | BD                                     | 562936         |
| <b>ANNEXIN V</b>  | PE                  | /            | BD                                     | 556422         |
| <b>CFSE</b>       | CFSE                | /            | Invitrogen Thermo<br>Fisher Scientific | C34554         |
| <b>ZOMBIE NIR</b> | APC-Cy7             | /            | BioLegend                              | 423105         |

**Table S3.** Conjugated monoclonal antibodies used in the T cell activation assay (Figure 4)



| TARGET     | FLUOROCHROME | CLONE  | COMPANY                                | PRODUCT |
|------------|--------------|--------|----------------------------------------|---------|
| CD4        | BV510        | SK3    | BD                                     | 562970  |
| CD8        | PerCP/Cy5.5  | RPA-T8 | BioLegend                              | 301032  |
| CD25       | PE-CF594     | M-A251 | BD                                     | 562403  |
| CD45RO     | BV786        | UCHL1  | BD                                     | 564290  |
| CD166      | BV421        | 3A6    | BD                                     | 562936  |
| CFSE       | CFSE         | /      | Invitrogen Thermo<br>Fisher Scientific | C34554  |
| ZOMBIE NIR | APC-Cy7      | /      | BioLegend                              | 423105  |

**Table S4** Conjugated monoclonal antibodies used for ALCAM and T cell activation assay (Figure 6).

|                                            | Day 30 T cell chimerism at 1 month after HCT |        |        |        |        |        |        |        | p-value |
|--------------------------------------------|----------------------------------------------|--------|--------|--------|--------|--------|--------|--------|---------|
|                                            | <95                                          |        |        |        | 95-100 |        |        |        |         |
|                                            | N                                            | Median | Q1     | Q3     | N      | Median | Q1     | Q3     |         |
| %CD6 <sup>+</sup> Treg                     | 56                                           | 74.25  | 68.11  | 82.68  | 11     | 69.9   | 58.83  | 80.45  | 0.26    |
| %CD6 <sup>+</sup> Tcon                     | 56                                           | 98.08  | 97.07  | 98.84  | 11     | 97.42  | 95.98  | 98.1   | 0.25    |
| %CD6 <sup>+</sup> CD8 <sup>+</sup> T cells | 56                                           | 87.04  | 82.92  | 91.7   | 11     | 76     | 70.91  | 94.49  | 0.62    |
| %ALCAM in CD14 <sup>+</sup> monocytes      | 75                                           | 80.44  | 72.83  | 85.79  | 12     | 83.78  | 81.16  | 85.91  | 0.16    |
| %ALCAM <sup>+</sup> mDC                    | 75                                           | 18.74  | 13.51  | 28.61  | 12     | 16.73  | 10.01  | 21.91  | 0.37    |
| %ALCAM <sup>+</sup> pDC                    | 75                                           | 95     | 92.05  | 97.97  | 12     | 94.11  | 88     | 99.13  | 0.71    |
| CD6 MFI in CD8 + T cells                   | 56                                           | 8886   | 7225.8 | 10488  | 11     | 9149.6 | 6234.4 | 10784  | 0.77    |
| CD6 MFI in Treg                            | 56                                           | 6507.4 | 5936   | 7969.9 | 10     | 6508.4 | 4721.9 | 8022.3 | 0.49    |
| CD6 MFI in Tcon                            | 56                                           | 17057  | 14328  | 18599  | 11     | 16107  | 13399  | 17949  | 0.44    |
| ALCAM MFI in CD14 <sup>+</sup> monocytes   | 75                                           | 10131  | 8379.5 | 11385  | 12     | 12141  | 8668.4 | 13496  | 0.22    |
| ALCAM MFI in mDCs                          | 75                                           | 3609.5 | 3043.6 | 4314.3 | 12     | 3209.7 | 2914.9 | 4103.2 | 0.37    |
| ALCAM MFI in pDCs                          | 75                                           | 18307  | 15962  | 22602  | 12     | 21176  | 16139  | 25528  | 0.30    |

**Table S5.** Expression of CD6 and ALCAM in patients with different levels of donor chimerism.

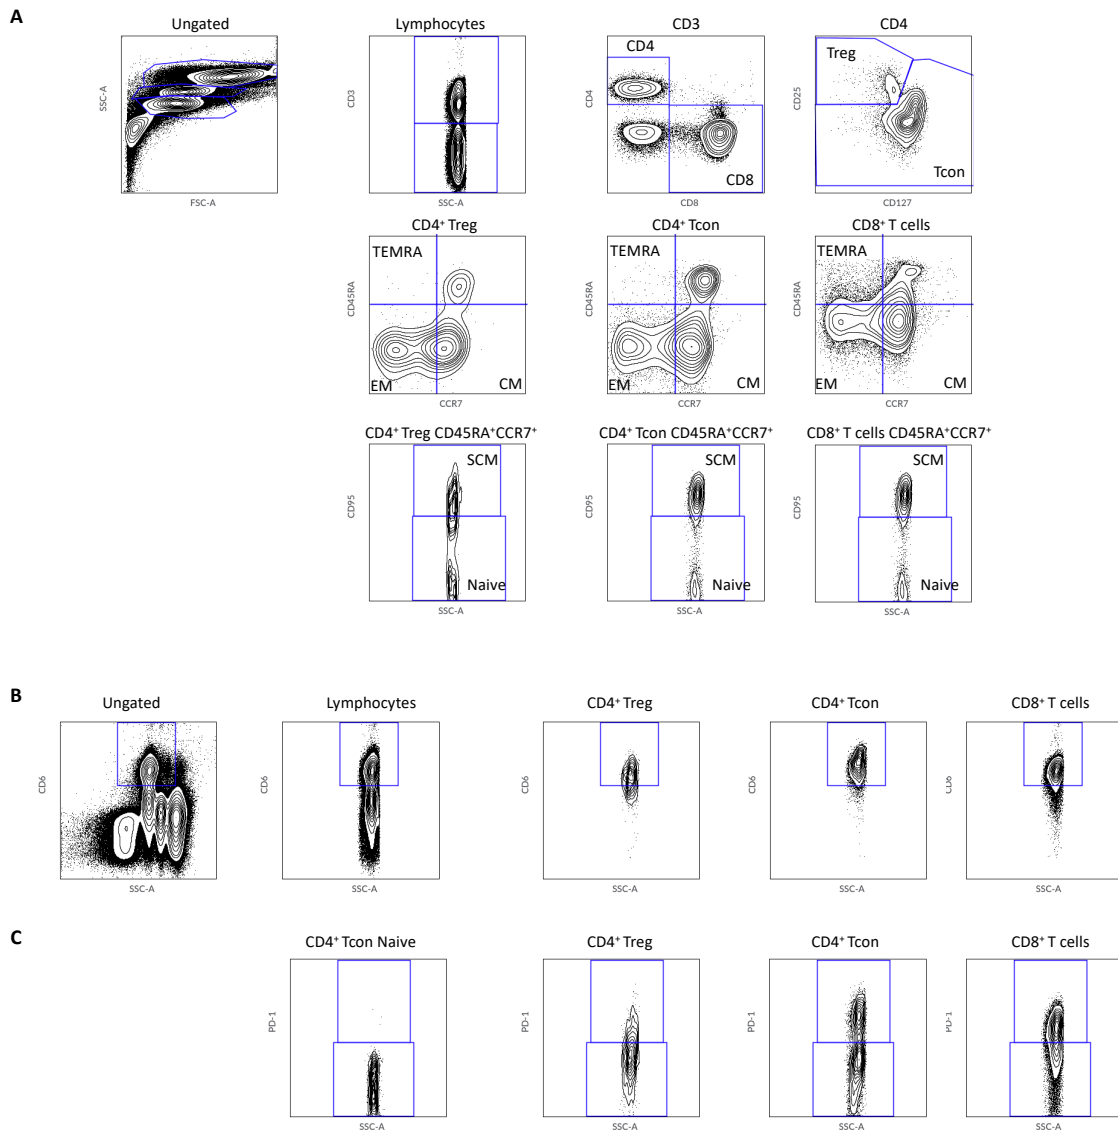

**Figure S1. Gating strategy for T cell subset analysis.** (A) Three major T cell populations, CD4Treg, CD4Tcon, and CD8 T cells, were defined as  $CD3^+CD4^+CD8^-CD25^+CD127^-$ ,  $CD3^+CD4^+CD8^-$  non-Treg cells and  $CD3^+CD4^+CD8^+$ , respectively. Within each T cell population, subsets were defined as follows: central memory (CM,  $CD45RA^-CCR7^+$ ), effector memory (EM,  $CD45RA^-CCR7^-$ ), terminally differentiated effector memory (TEMRA,  $CD45RA^+CCR7^-$ ), T cells naïve ( $CD45RA^+CCR7^+ CD95^-$ ) and stem cell memory (SCM,  $CD45RA^+CCR7^+ CD95^+$ ). (B) The threshold of CD6 gate on T cell subsets was made using monocytes as internal negative control. (C) PD-1 expression was monitored on each T cell subset, using Tcon naïve cells as internal negative control. 265 peripheral blood samples were tested with this panel: n=9 HD; n=67 at 1 mo; n=76 at 2 mo; n=78 at 3 mo; n=35 at 6mo.

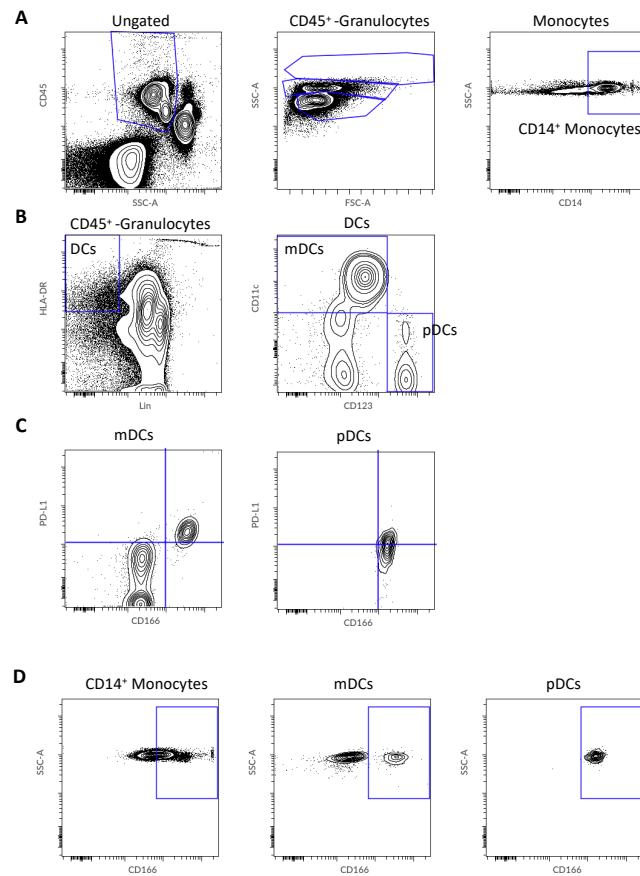

**Figure S2. Gating strategy for dendritic cell subsets and monocyte analysis.** (A) Monocyte were defined within the CD45<sup>+</sup> cells, after excluding granulocytes, based on the SSC-A, FSC-A and CD14 expression. (B) Dendritic cells (DCs) were defined within the CD45<sup>+</sup> cells, after excluding granulocytes, based on the positivity of HLA-DR and negativity of lineage markers (CD14, CD3, CD19 and CD56). DC subsets were defined as follows: myeloid DCs (mDCs, CD11c<sup>+</sup>CD123<sup>-</sup>) and plasmacytoid DCs (pDCs, CD11c<sup>-</sup>CD123<sup>+</sup>). (C) PD-L1 and CD166 (ALCAM) expression on both mDCs and pDCs. (D) CD166 (ALCAM) expression on CD14<sup>+</sup> monocytes, mDCs and pDCs. Samples with less than 1000 DC events were excluded from the analysis. 236 peripheral blood samples were tested with this panel: n=9 HD; n=62 at 1 mo; n=66 at 2 mo; n=69 at 3 mo; n=30 at 6mo.

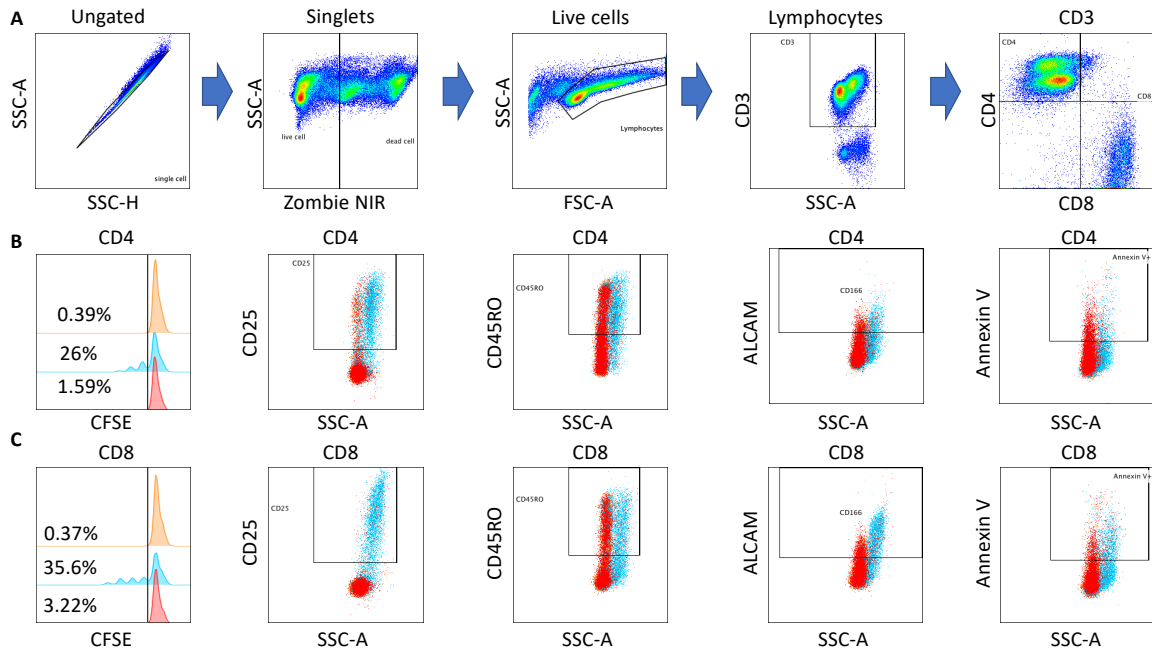

**Figure S3. Gating strategy for *in vitro* functional assays.** (A) Example of the gating strategy of CD4<sup>+</sup> and CD8<sup>+</sup> T cells, after exclusion of doublets and dead cells. Gating strategy on CD4<sup>+</sup> T cells (B) and CD8<sup>+</sup> T cells (C) for CFSE dilution (T cell proliferation), CD25 (T cell activation), CD45RO (T cell maturation), ALCAM and Annexin V (T cell apoptosis) expression. Cell alone (orange), cells+beads+cetuximab (blue), cells+beads+itolizumab (red).

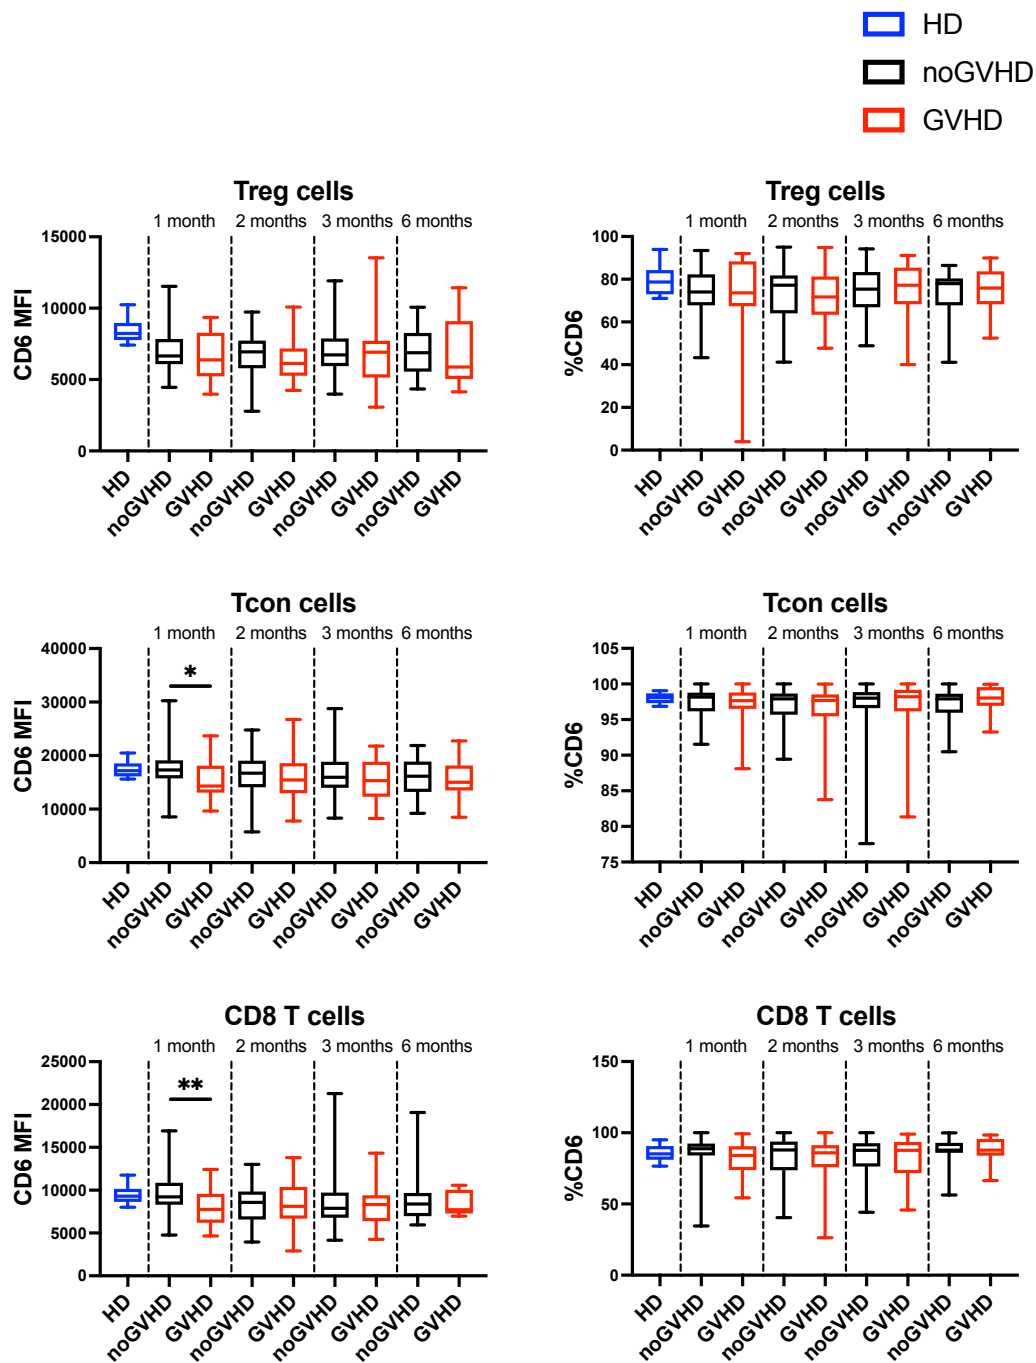

**Figure S4. Comparison of CD6 expression on Treg, Tcon and CD8 T cells in patients with and without GVHD at specific time points after transplant.** CD6 MFI was lower in GVHD group compared noGVHD group at 1 month after transplant in Tcon and CD8 T cells. Statistically significant differences are noted: \*  $P < 0.05$ ; \*\*  $P < 0.01$ . Wilcoxon rank-sum test. HD,  $n=9$ ; noGVHD month 1,  $n=41$ ; GVHD month 1,  $n=26$ ; noGVHD month 2,  $n=40$ ; GVHD month 2,  $n=36$ ; noGVHD month 3,  $n=45$ ; GVHD month 3,  $n=33$ ; noGVHD month 6,  $n=23$ ; GVHD month 6,  $n=12$ .

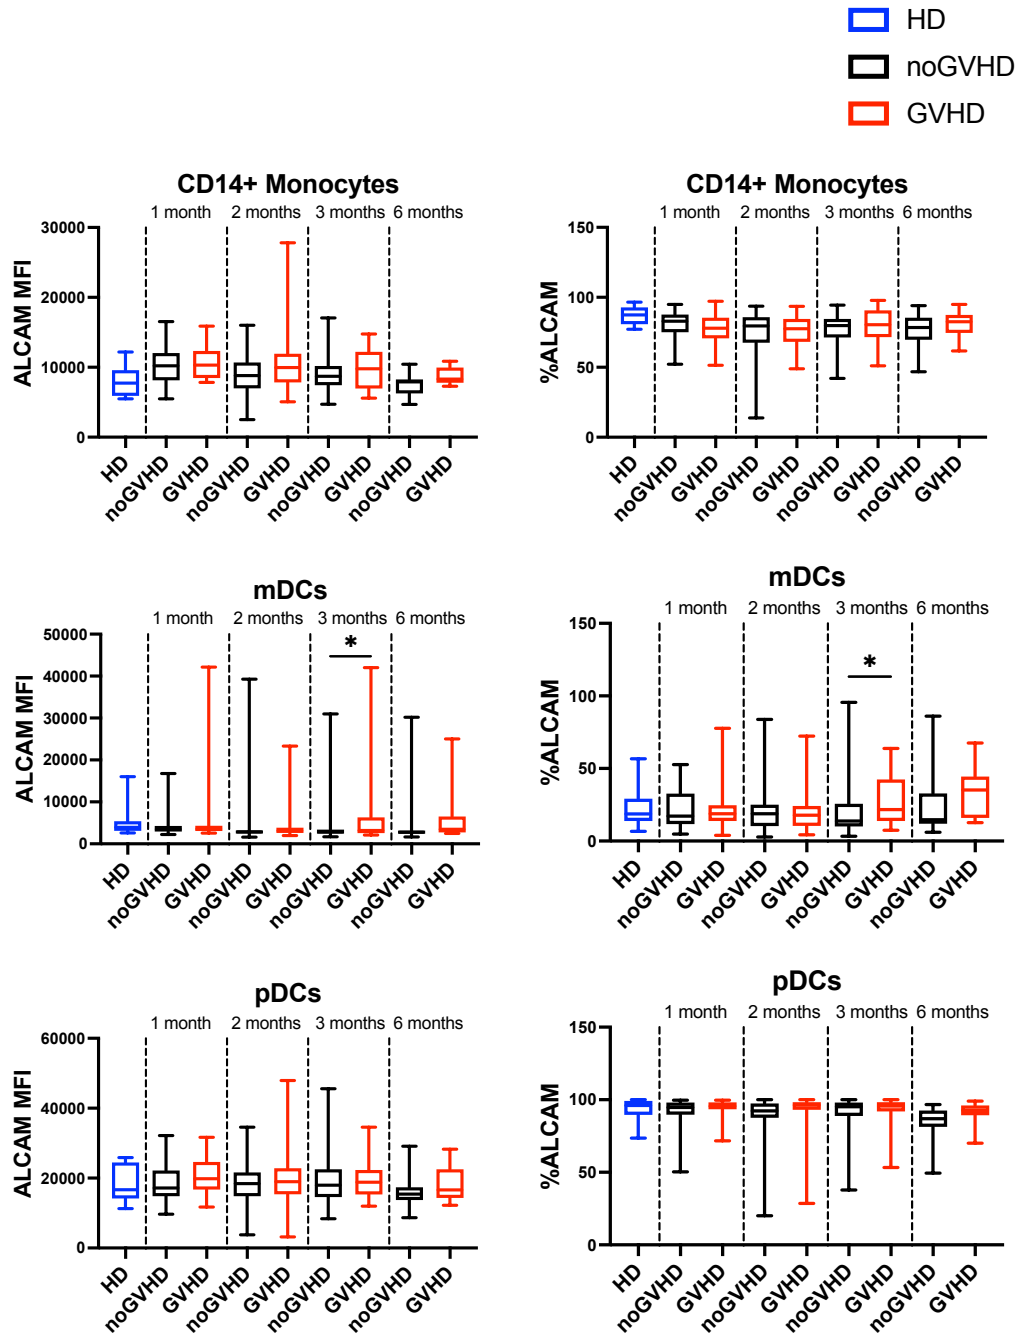

**Figure S5. Comparison of ALCAM expression on CD14+ Monocytes, mDCs and pDCs in patients with and without GVHD at specific time points after transplant. ALCAM MFI and % of ALCAM positive cells on mDCs was higher in the GVHD cohort compared to noGVHD at 3 months after transplant. Statistically significant differences are noted: \*  $P < 0.05$ ; Wilcoxon rank-sum test. HD, n=9; noGVHD month 1, n=41; GVHD month 1, n=26; noGVHD month 2, n=40; GVHD month 2, n=36; noGVHD month 3, n=45; GVHD month 3, n=33; noGVHD month 6, n=23; GVHD month 6, n=12.**

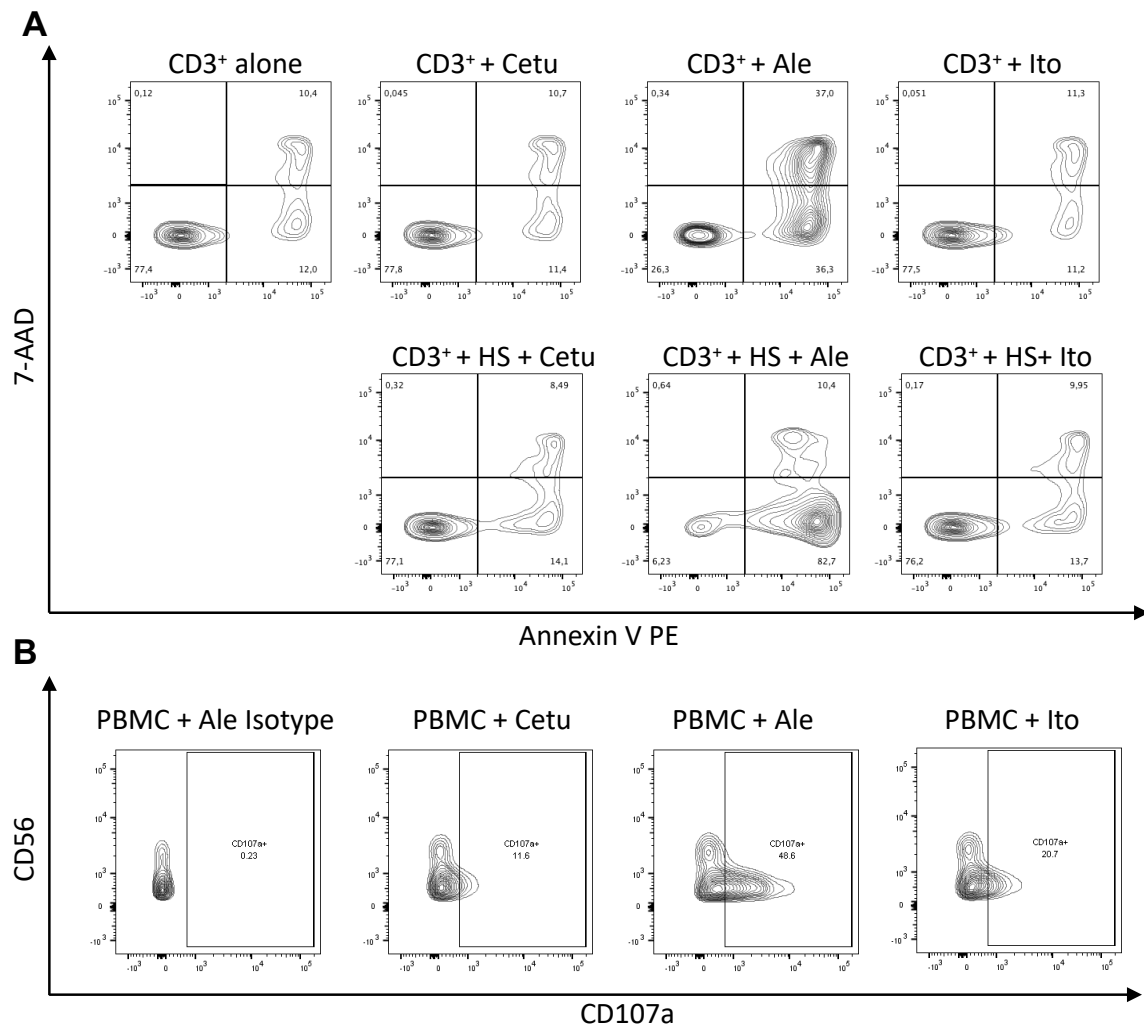

**Figure S6. Gating strategy to test itolizumab complement dependent cytotoxicity (CDC), antibody dependent cytotoxicity (ADC) and antibody direct cellular cytotoxicity (ADCC) analysis.**

(A) Representative example of percentage of cell lyses, based on the expression of 7-AAD and annexin V. (B) Representative example of CD107a expression on NK cells, as marker of ADCC. An APC-conjugated mouse isotype was used to design the gate for CD107a. Percentage of cell lysis was calculated by adding the percentage of positive cells for 7-AAD or Annexin V or both. CDC activity was calculated by subtracting the values obtained in the medium + antibody from the values obtained in the culture with medium + antibody + human serum (HS). ADC activity was calculated by subtracting the values obtained in the culture with medium alone from the values obtained in the culture with medium + antibody. For ADCC PBMC from HD were cultured in the presence of antibody for 6 hours. Both percentage of cell lyses and CD107a expression on NK cells were evaluated after 6 hours of culture.
